# Supplementary material for: Enhancement of the properties of ZnAl-LDHs for photocatalytic nitrogen reduction reaction by controlling anion intercalation
Source: Royal Society of Chemistry journal article supplement (doi:10.1039/d2qi02030k), 2022-12-01
Supplement: d2qi02030k1.pdf [file d2qi02030k1.pdf]

**Enhancement the properties of ZnAl-LDH for photocatalytic  
nitrogen reduction reaction by controlling anion intercalation**

Senda Su, Xiaoman Li,\* Mengyao Tan, Xu Zhang, Yingying Wang, Yanzhong Duan,, Juan Peng and Min Luo\*

State Key Laboratory of High-efficiency Utilization of Coal and Green Chemical Engineering,  
School of Chemistry and Chemical Engineering, Ningxia University, Yinchuan, Ningxia 750021,

\*Corresponding author: luominjy@nxu.edu.cn, lixm2017@nxu.edu.cn

Total number of pages: 19

Total number of figures: 16

Total number of tables: 1

## Table of Contents

1. Fig. S1: The XRD pattern and FT-IR spectra of  $\text{PMo}_{12-x}\text{V}_x$  ( $X = 0, 1, 2, 3, 8$ ).
2. Fig. S2: The  $\text{N}_2$  adsorption–desorption isotherms and BET surface area of ZnAl-LDHs.
3. Fig. S3: The FT-IR spectra of the ZnAl-LDHs at 400-4000  $\text{cm}^{-1}$  (a and b),  $\text{PMo}_{12-x}\text{V}_x@ZnAl-LDH$  ( $X = 0, 1, 2, 3, 8$ ) at 400-1800  $\text{cm}^{-1}$ (c).
4. Fig. S4: The  $\text{NH}_4^+$  detection of standard spectra (a) and fitting curve (b) by ion chromatography.
5. Fig. S5: The  $\text{NH}_4^+$  detection of UV-vis absorption spectra (a) and fitting curve (b).
6. Fig. S6: The gas phase products rate of the ZnAl-LDHs.
7. Fig. S7:  $^1\text{H}$  NMR spectra of the solution obtained after reaction using  $^{15}\text{N}_2$  as the feeding gas on  $\text{PMo}_9\text{V}_3@ZnAl-LDH$ .
8. Fig. S8: The  $\text{N}_2\text{H}_4$  detection of UV-vis absorption spectra (a) and fitting curve (b).
9. Fig. S9: The  $\text{NH}_4^+$  production rate of the PMoV in air.
10. Fig. S10: The XRD pattern and FT-IR spectra of  $\text{PMo}_9\text{V}_3@ZnAl-LDH$  before and after cycle reaction.
11. Fig. S11: The C 1s XPS spectrum.
12. Fig. S12: The UV-vis diffuse reflectance spectra and Tauc plots of  $\text{PMo}_{12-x}\text{V}_x@ZnAl-LDH$  ( $X = 0, 1, 2, 3, 8$ ).
13. Fig. S13: The contact angle images of  $\text{PMo}_{12-x}\text{V}_x@ZnAl-LDH$  ( $X = 1$  (a), 2 (b), 3 (c), 8 (d)).
14. Fig. S14: The EIS pattern (a) and photocurrent pattern (b)of  $\text{PMo}_{12-x}\text{V}_x@ZnAl-LDH$  ( $X = 3, 8$ ).
15. Fig. S15: The Mott-Schottky curves of ZnAl-LDHs.
16. Fig. S16: The VB XPS spectrum of  $\text{PMo}_9\text{V}_3$ .
17. Table S1: Photocatalytic nitrogen fixation performance of LDH-based materials.

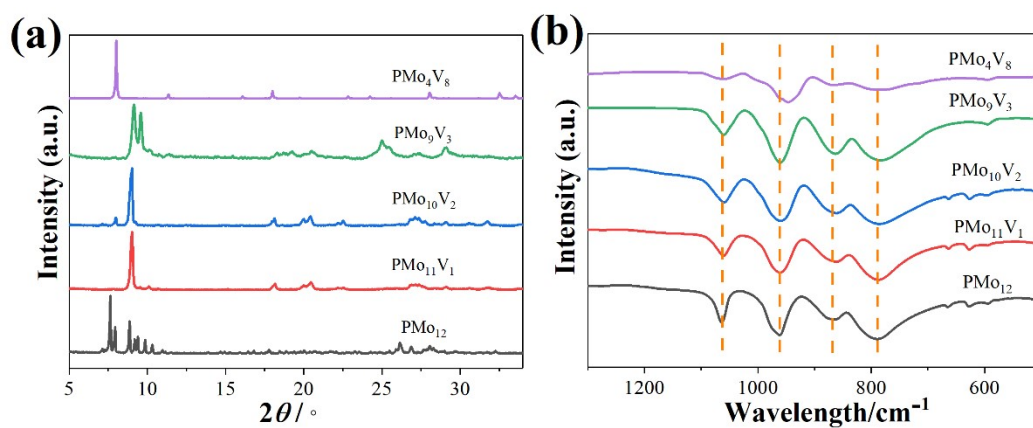

**Figure S1.** The XRD pattern (a) and FT-IR spectra (b) of  $\text{PMo}_{12-x}\text{V}_x$  ( $X = 0, 1, 2, 3, 8$ ).

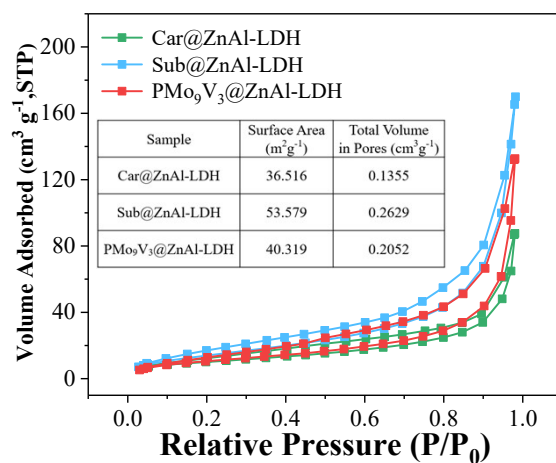

**Figure S2.** The N<sub>2</sub> adsorption–desorption isotherms and BET surface area of ZnAl-LDHs.

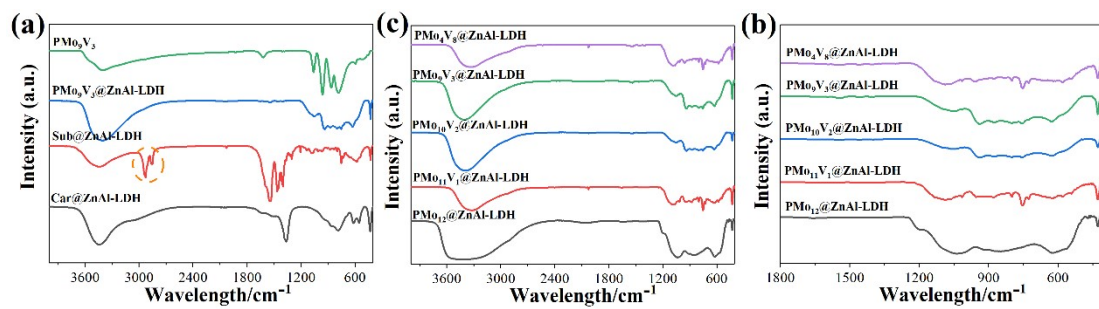

**Figure S3.** The FT-IR spectra of the ZnAl-LDHs at 400-4000 cm<sup>-1</sup> (a and b), PMo<sub>12-x</sub>V<sub>x</sub>@ZnAl-LDH (X = 0, 1, 2, 3, 8) at 400-1800 cm<sup>-1</sup>(c).

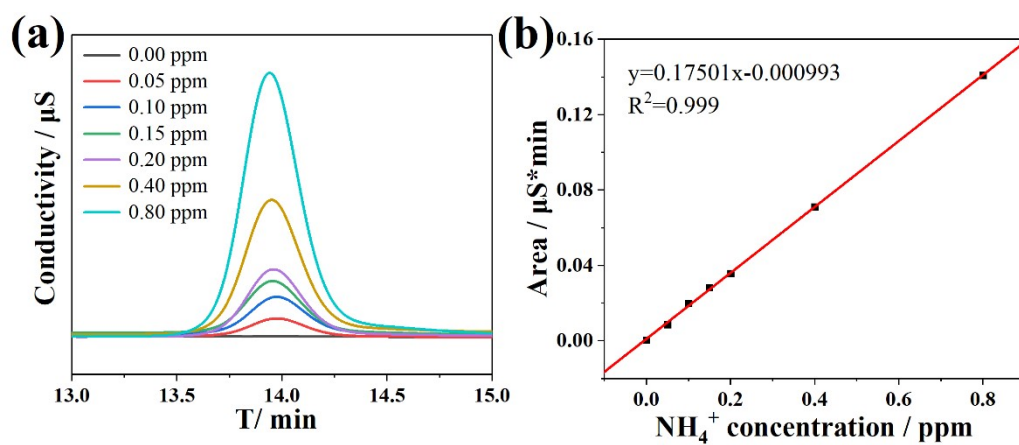

**Figure S4.** The  $\text{NH}_4^+$  detection of standard spectra (a) and fitting curve (b) by ion chromatography.

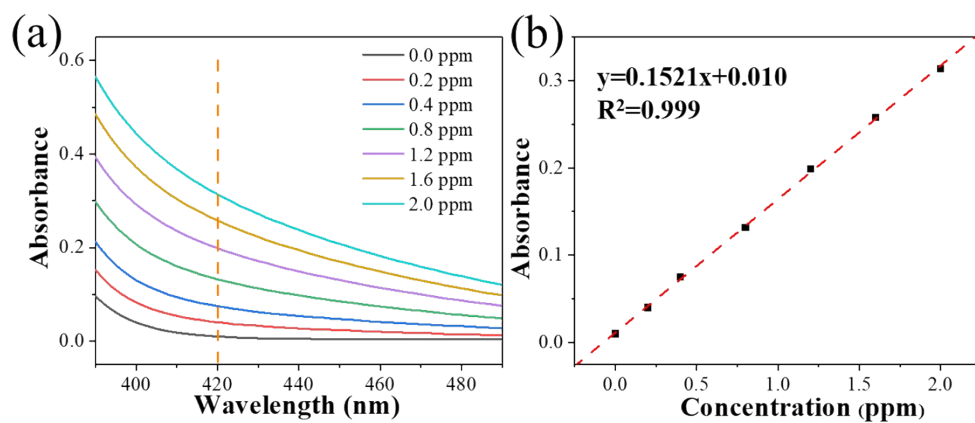

**Figure S5.** The  $\text{NH}_4^+$  detection of UV-vis absorption spectra (a) and fitting curve (b).

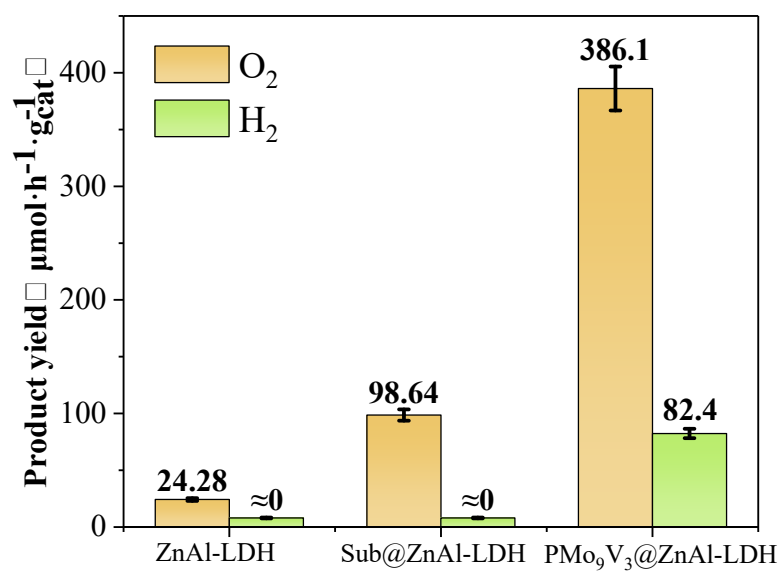

**Figure S6.** The gas phase products rate of the ZnAl-LDHs.



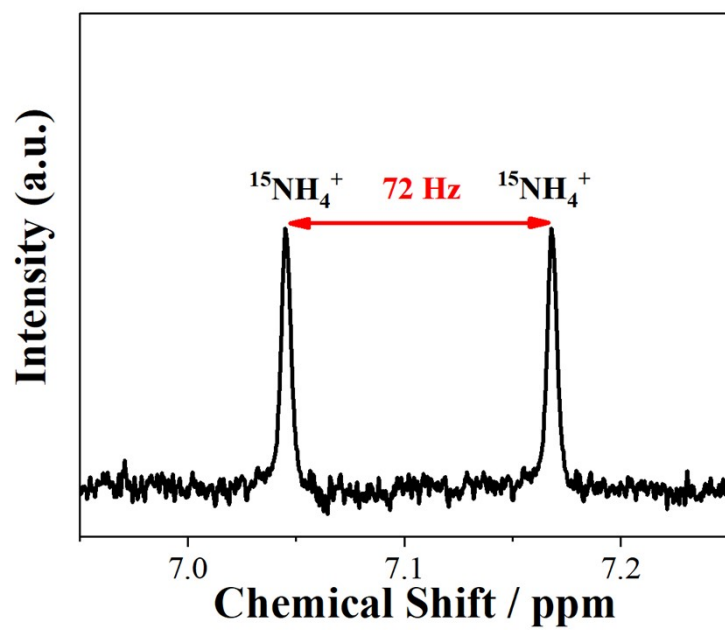

**Figure S7.**  $^1\text{H}$  NMR spectra of the solution obtained after reaction using  $^{15}\text{N}_2$  as the feeding gas on  $\text{PMo}_9\text{V}_3@\text{ZnAl-LDH}$ .

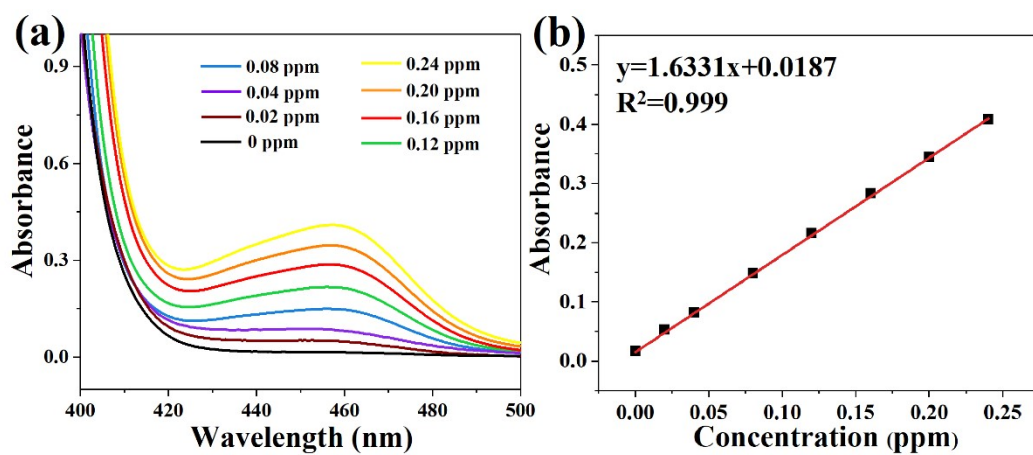

**Figure S8.** The  $N_2H_4$  detection of UV-vis absorption spectra (a) and fitting curve (b).

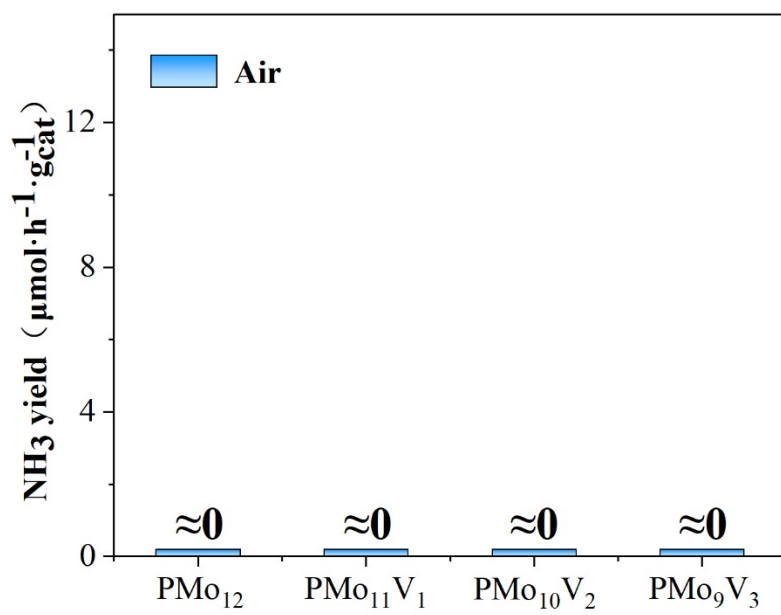

**Figure S9.** The  $\text{NH}_4^+$  production rate of the PMoV in air.

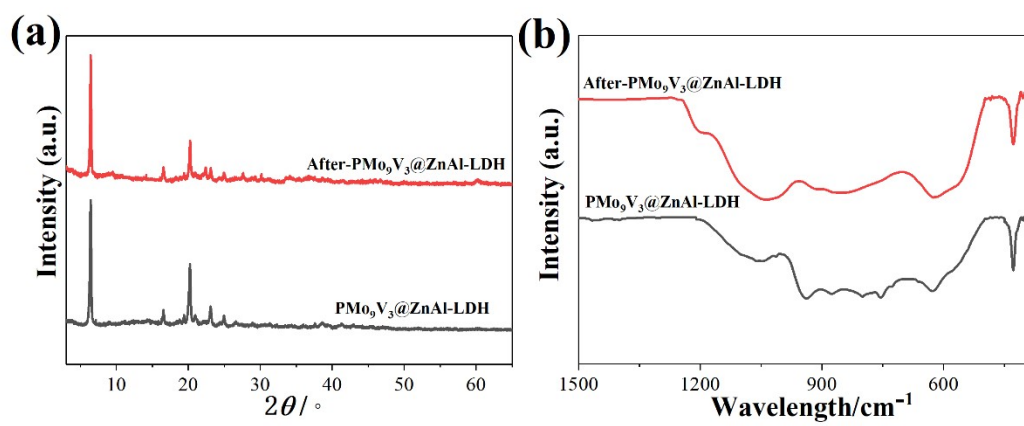

**Figure S10.** The XRD pattern (a) and FT-IR spectra (b) of  $\text{PMo}_9\text{V}_3@\text{ZnAl-LDH}$  before and after cycle reaction.

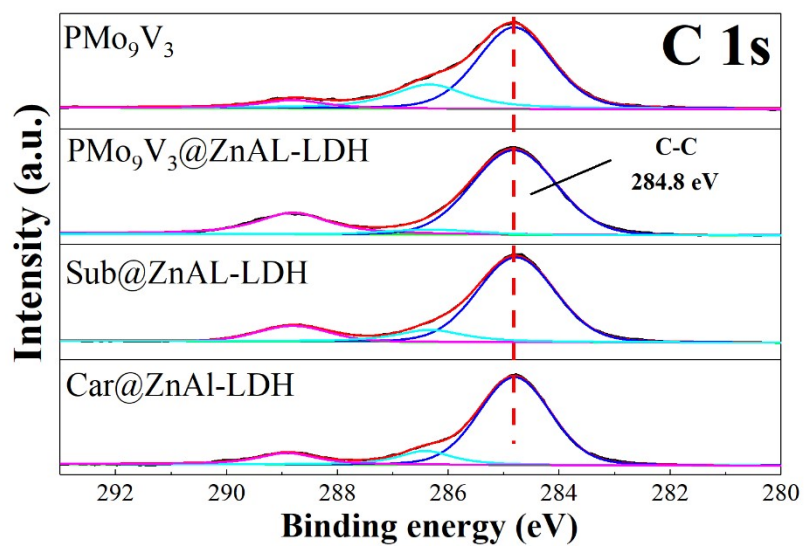

**Figure S11.** The C 1s XPS spectrum.

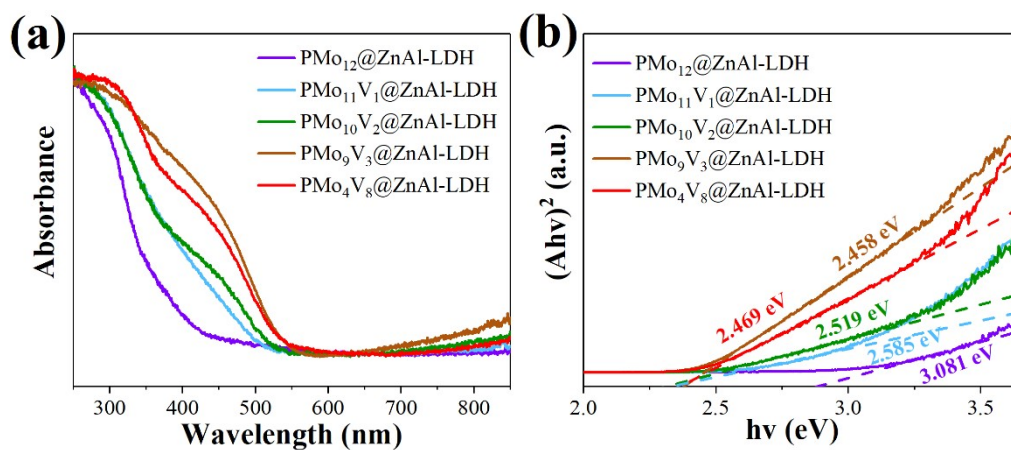

**Figure S12.** The UV-vis diffuse reflectance spectra (a) and Tauc plots (b) of  $\text{PMo}_{12-x}\text{V}_x@ZnAl-LDH$  ( $X = 0, 1, 2, 3, 8$ ).

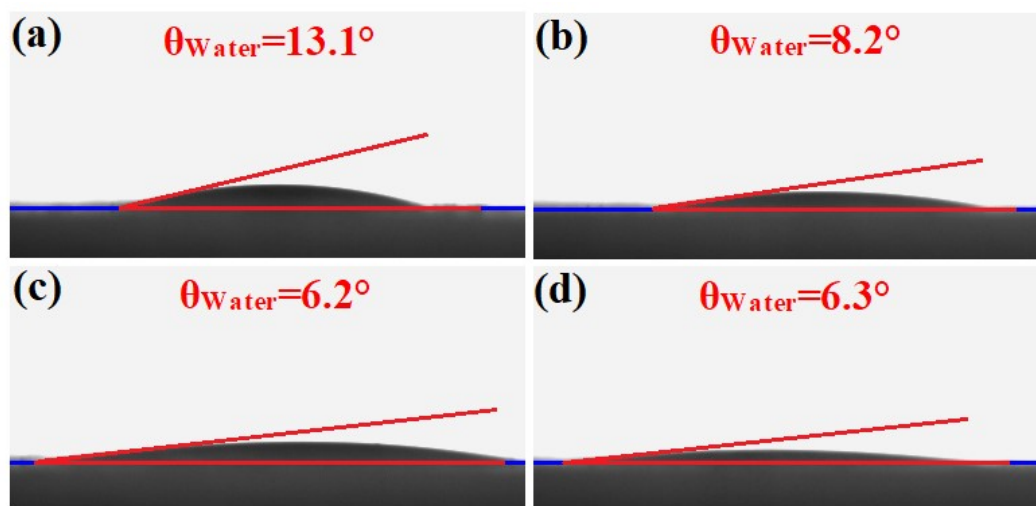

**Figure S13.** The contact angle images of  $\text{PMo}_{12-X}\text{V}_X@ZnAl\text{-LDH}$  ( $X = 1$  (a), 2 (b), 3 (c), 8 (d)).

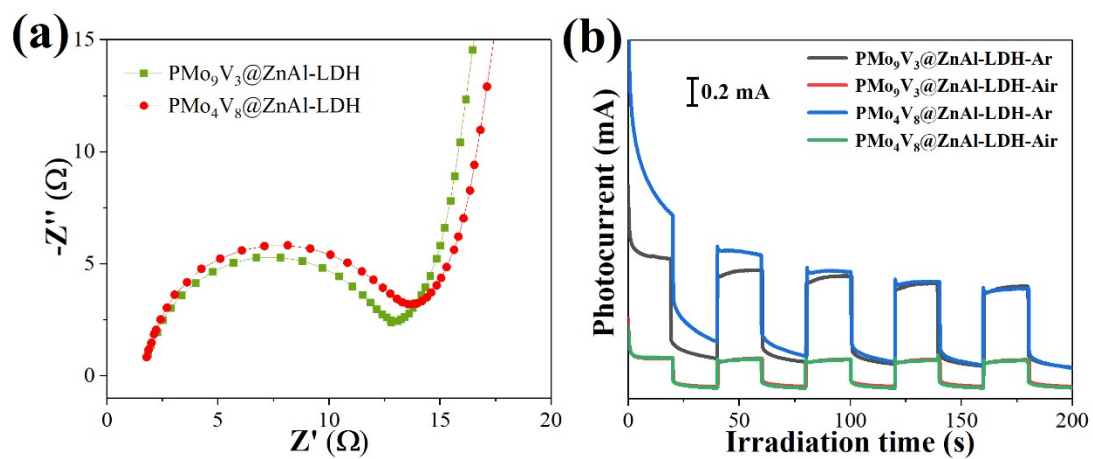

**Figure S14.** The EIS pattern (a) and photocurrent pattern (b) of  $\text{PMo}_{12-X}\text{V}_X@ZnAl-LDH$  ( $X = 3, 8$ ).



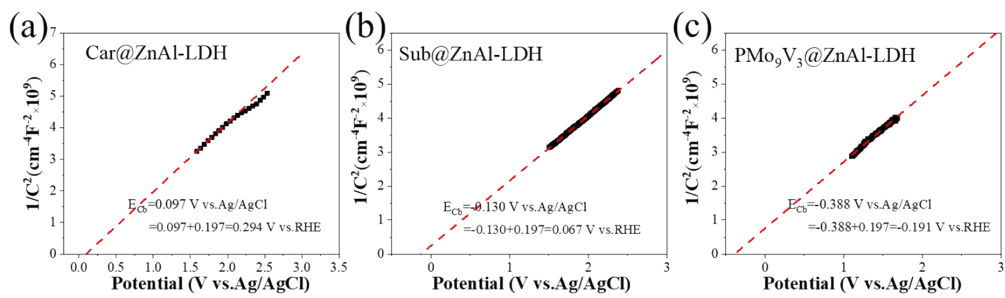

**Figure S15.** The Mott-Schottky curves of ZnAl-LDHs.

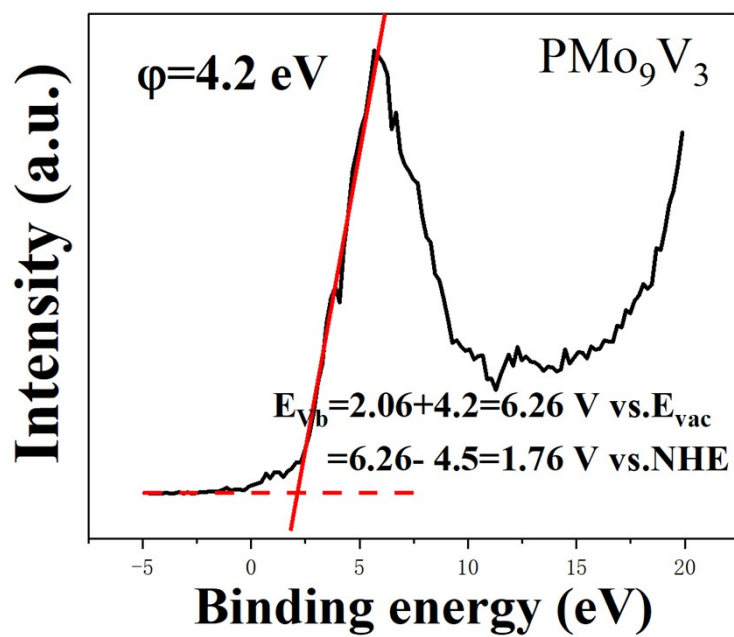

Figure S16. The VB XPS spectrum of  $\text{PMo}_9\text{V}_3$ .

**Table S1.** Photocatalytic nitrogen fixation performance of LDH-based materials.

| Catalyst                                   | Light source  | Detection method | organic scavengers | NH <sub>3</sub> evolution rate/ $\mu\text{mol h}^{-1} \text{g}^{-1}_{\text{cat}}$ | Reference |
|--------------------------------------------|---------------|------------------|--------------------|-----------------------------------------------------------------------------------|-----------|
| NiV-LDH-11-AMO                             | Full spectrum | IC <sup>a</sup>  | None               | 176                                                                               | [1]       |
| 0.5%-CuZnAl-LDH                            | Full spectrum | IC <sup>a</sup>  | None               | 110                                                                               | [2]       |
| ZnAl-LDH-NS                                | Full spectrum | NR <sup>b</sup>  | None               | 15.28                                                                             | [3]       |
| ZnAl-LDH-1h(alkaline etching)              | Full spectrum | IC <sup>a</sup>  | None               | 25.76                                                                             | [4]       |
| Sub@ZnAl-LDH                               | Full spectrum | IC <sup>a</sup>  | None               | 48.91                                                                             | This work |
| PMo <sub>9</sub> V <sub>3</sub> @ ZnAl-LDH | Full spectrum | IC <sup>a</sup>  | None               | 89.16                                                                             | This work |

<sup>a</sup> The detection method of ion chromatography.

<sup>b</sup> The detection method of Nessler's reagent.

[1] X. Liu, Y. Li, J. Zhang, J. Lu, Ultrathin Ni/V-layered double hydroxide nanosheets for efficient visible-light-driven photocatalytic nitrogen reduction to ammonia, *Nano Research* 14(10) (2021) 3372-3378.

[2] S. Zhang, Y. Zhao, R. Shi, C. Zhou, G.I.N. Waterhouse, L.-Z. Wu, C.-H. Tung, T. Zhang, Efficient Photocatalytic Nitrogen Fixation over Cu-delta(+)-Modified Defective ZnAl-Layered Double Hydroxide Nanosheets, *Advanced Energy Materials* 10(8) (2020).

[3] Y. Zhao, Y. Zhao, G.I.N. Waterhouse, L. Zheng, X. Cao, F. Teng, L.-Z. Wu, C.-H. Tung, D. O'Hare, T. Zhang, Layered-Double-Hydroxide Nanosheets as Efficient Visible-Light-Driven Photocatalysts for Dinitrogen Fixation, *Advanced Materials* 29(42) (2017).

[4] Y. Zhao, L. Zheng, R. Shi, S. Zhang, X. Bian, F. Wu, X. Cao, G.I.N. Waterhouse, T. Zhang, Alkali Etching of Layered Double Hydroxide Nanosheets for Enhanced Photocatalytic N<sub>2</sub> Reduction to NH<sub>3</sub>, *Advanced Energy Materials* 10(34) (2020).
